# Supplementary material for: Cytokine Expression and Macrophage Localization in Xenograft and Allograft Tumor Models Stimulated with Lipopolysaccharide
Source: PubMed Central journal article supplement (PMC5979423; doi:10.3390/ijms19041261), 2018-04-23
Supplement: ijms-19-01261-s001.pdf [file ijms-19-01261-s001.pdf]

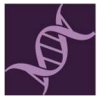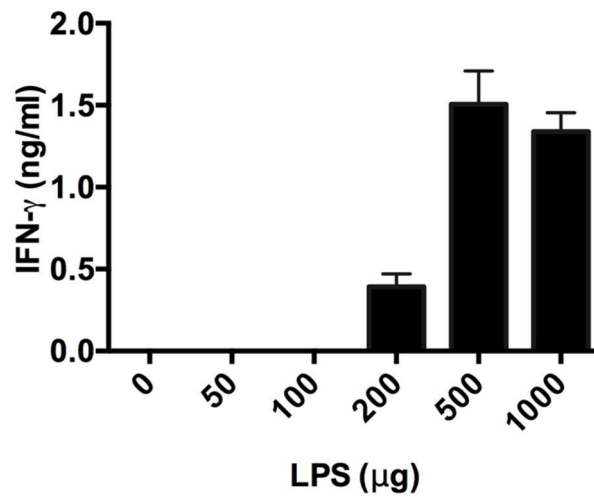

**Figure S1.** IFN- $\gamma$  production by LPS in nude mice. A serial concentration of LPS (0, 50, 100, 200, 500, 1000  $\mu\text{g}$  in 200  $\mu\text{L}$  PBS /body) was i.p. injected and blood samplings were carried out at 6 h. The serum levels of IFN- $\gamma$  were determined by ELISA. The data are presented as the mean  $\pm$  SEM.  $n = 5$ .
